# Supplementary material
Source: MDPI journal article supplement (https://www.mdpi.com/2673-7051/3/3/39)
Supplement: s1 [file s1 › adolescents-2482138-supplementary.pdf]

**Supplementary Table S1.** The results of the fully adjusted model for poor mental health among adolescents with and without RSHC experiences, with the ORs of the protective factors, as seen in Table 2.

| <b>Title 1</b>                      | <b>Model 6 Fully adjusted</b> |
|-------------------------------------|-------------------------------|
| No RSHC (Reference)                 | 1                             |
| One RSHC                            | 1.30 (1.07–1.56)              |
| Several RSHC                        | 1.51 (1.22–1.88)              |
| Sex                                 | 0.42 (0.36–0.50)              |
| No economic stress                  | 0.61 (0.46–0.81)              |
| Feeling happy about life            | 0.26 (0.18–0.36)              |
| Good sleep                          | 0.37 (0.27–0.50)              |
| Not being bullied at school         | 0.44 (0.33–0.58)              |
| Feeling happy with leisure          | 0.49 (0.39–0.62)              |
| Enjoying school                     | 0.53 (0.43–0.65)              |
| No use of alcohol                   | 0.55 (0.46–0.65)              |
| Having dinner daily                 | 0.61 (0.48–0.78)              |
| Feeling safe at home                | 0.61 (0.42–0.88)              |
| Not being violated via social media | 0.64 (0.51–0.81)              |
| Falling asleep well                 | 0.67 (0.54–0.82)              |
| Living with both parents            | 0.79 (0.67–0.94)              |
